# Supplementary material for: Evidence-based practice utilisation and its associated factors among nurses working at public hospitals in West Shoa zone, central Ethiopia: a cross-sectional study
Source: HighWire-hosted journal article supplement (doi:10.1136/bmjopen-2022-063651), 2023-01-01
Supplement: bmjopen-2022-063651supp001_data_supplement.pdf [file bmjopen-2022-063651supp001_data_supplement.pdf]

## Annex I. Instruments (questionnaire)

Subject No \_\_\_\_\_

Ward/Unit: \_\_\_\_\_

Date: \_\_

Introduction: This instrument is divided into 5 sections. Section 1 is related to yours Personal data. Section 2 is your knowledge regarding EBP. Section 3 is your sources of evidence for utilization of EBP. Section 4 is about Utilization of EBP. Section 5 is about Barriers to utilization of EBP and the last section is about Facilitators for utilization of EBP.

| <b>Part I: Socio-demographic Data</b> |                                |                                                                                                                             |
|---------------------------------------|--------------------------------|-----------------------------------------------------------------------------------------------------------------------------|
| <b>1</b>                              | Age                            | ----- in year                                                                                                               |
| <b>2</b>                              | Sex                            | 1. Male<br>2. Female                                                                                                        |
| <b>3</b>                              | Hospital in which you work     | 1. Referral hospital<br>2. General hospital<br>3. District hospital                                                         |
| <b>4</b>                              | Work unit in which you working | 1 Medical ward<br>2 Surgical ward<br>3 Intensive care unit<br>4 Emergency Unit<br>5 Pediatrics<br>6 OPD            7,others |
| <b>5</b>                              | Marital status                 | 1. Single<br>2. Married<br>3. Widowed<br>4. Divorced                                                                        |
| <b>6</b>                              | Ethnicity                      | 1. Oromo<br>2. Amhara                                                                                                       |

|           |                              |                                                                                   |
|-----------|------------------------------|-----------------------------------------------------------------------------------|
|           |                              | 3. Tigre<br>4. Gurage<br>5. Others specify ____                                   |
| <b>7</b>  | Religion                     | 1. Orthodox<br>2. Muslim<br>3. Protestant<br>4. Catholic<br>5. Other specify ____ |
| <b>9</b>  | Work experience              | _____ in year                                                                     |
| <b>10</b> | Educational level            | 1. Diploma<br>2. BSc<br>3. MSc                                                    |
| <b>11</b> | Current role at the hospital | 1. Staff nurse<br>2. Head nurse/ nurses at managerial position                    |

**Part II: Nurses' knowledge regarding Evidence Based Practice (EBP)**

| <b>s. no</b> | Please respond to the next items by indicating Yes or No to knowledge you have regarding EBP. | <b>Yes</b> | <b>No</b> |
|--------------|-----------------------------------------------------------------------------------------------|------------|-----------|
| <b>1</b>     | Are you aware of the concept of EBP in nursing?                                               |            |           |
| <b>2</b>     | I have knowledge to implement EBP principles.                                                 |            |           |

|   |                                                                       |  |  |
|---|-----------------------------------------------------------------------|--|--|
| 3 | Evidence-based practice is a problem solving approach.                |  |  |
| 4 | It enhances delivering of highest quality of care.                    |  |  |
| 5 | EBP combines knowledge and theory.                                    |  |  |
| 6 | EBP fills the gap between research theory and practice when utilized. |  |  |
| 7 | There is a need of evidence-based practice in nursing.                |  |  |
| 8 | EBP is for nurse educators and also for those in the clinical area.   |  |  |

### Part III: Sources of evidence for utilization of EBP

I. To what extent do you personally use information from the following sources? Select and Put (✓) in the box below for each question.

| s. no | Please respond to the next items by indicating the no 1, 2, 3, 4, or 5 that comes closer to what extent you trust with sources that you use for | 1 | 2 | 3 | 4 | 5 |
|-------|-------------------------------------------------------------------------------------------------------------------------------------------------|---|---|---|---|---|
| 1     | Class room                                                                                                                                      |   |   |   |   |   |
| 2     | Hospital protocols                                                                                                                              |   |   |   |   |   |
| 3     | National guidelines                                                                                                                             |   |   |   |   |   |
| 4     | Training                                                                                                                                        |   |   |   |   |   |
| 5     | Colleague                                                                                                                                       |   |   |   |   |   |
| 6     | Personal experience                                                                                                                             |   |   |   |   |   |
| 7     | Nursing journals                                                                                                                                |   |   |   |   |   |
| 8     | Internet                                                                                                                                        |   |   |   |   |   |

|   |           |  |  |  |  |  |
|---|-----------|--|--|--|--|--|
| 9 | Textbooks |  |  |  |  |  |
|---|-----------|--|--|--|--|--|

## Part VI. EBP activity questions to assess level of utilization of EBP among Nurses

| s.no | Activities<br>(How often have you personally involved in the following activities?)                        | Frequencies                                                                                                             |   |   |   |   |
|------|------------------------------------------------------------------------------------------------------------|-------------------------------------------------------------------------------------------------------------------------|---|---|---|---|
|      |                                                                                                            | 1                                                                                                                       | 2 | 3 | 4 | 5 |
|      |                                                                                                            | [1] Never, [2] Sometimes (<1/month), [3] Usually (1-2times/month), [4] often (weekly), [5] Always (several times/week). |   |   |   |   |
| 1    | Asked clinical questions related with your nursing care practice                                           |                                                                                                                         |   |   |   |   |
| 2    | Look for information, research, evidences, to support your nursing practice                                |                                                                                                                         |   |   |   |   |
| 3    | critically appraised any evidence which answers your clinical questions                                    |                                                                                                                         |   |   |   |   |
| 4    | Use/integrating current evidence/guideline to guide the nursing care practice over                         |                                                                                                                         |   |   |   |   |
| 5    | Evaluate the outcome of using current evidence                                                             |                                                                                                                         |   |   |   |   |
| 6    | Sharing or Teaching others about new way of practice[current guideline to guide the nursing care practice] |                                                                                                                         |   |   |   |   |

**Part V: Barriers to utilization of EBP**

| <b>s. no</b> | Please respond to the next items by indicating the number 1, 2, 3, 4, or 5 that comes closer to how much you agree with barriers to utilization of EBP. | <b>1</b> | <b>2</b> | <b>3</b> | <b>4</b> | <b>5</b> |
|--------------|---------------------------------------------------------------------------------------------------------------------------------------------------------|----------|----------|----------|----------|----------|
| <b>1</b>     | Lack of autonomy to change practice                                                                                                                     |          |          |          |          |          |
| <b>2</b>     | Inadequate understanding of research terms                                                                                                              |          |          |          |          |          |
| <b>3</b>     | Inability to understand statistical terms used in research                                                                                              |          |          |          |          |          |
| <b>4</b>     | Difficulty in judging the quality of research                                                                                                           |          |          |          |          |          |
| <b>5</b>     | Inability to properly interpret the results of research                                                                                                 |          |          |          |          |          |
| <b>6</b>     | Insufficient time at workplace to implement EBP                                                                                                         |          |          |          |          |          |
| <b>7</b>     | Heavy workload at workplace to implement EBP                                                                                                            |          |          |          |          |          |
| <b>8</b>     | Insufficient resources (e.g. equipment, internet, computer, protocols, guidelines ) to implement EBP                                                    |          |          |          |          |          |
| <b>9</b>     | The relevant literature is not available                                                                                                                |          |          |          |          |          |
| <b>10</b>    | No confident in judging the quality of research                                                                                                         |          |          |          |          |          |
| <b>11</b>    | Lack of authority in the work place to implement EBP                                                                                                    |          |          |          |          |          |
| <b>12</b>    | Insufficient proficiency in English language                                                                                                            |          |          |          |          |          |
| <b>13</b>    | The nurse is isolated from experienced colleagues with whom to discuss the research                                                                     |          |          |          |          |          |
| <b>14</b>    | Physicians are not cooperative with the implementation                                                                                                  |          |          |          |          |          |
| <b>15</b>    | Unjustified research conclusions to nursing                                                                                                             |          |          |          |          |          |

|           |                                                                                |  |  |  |  |  |
|-----------|--------------------------------------------------------------------------------|--|--|--|--|--|
| <b>16</b> | Other staffs are not supportive of implementation                              |  |  |  |  |  |
| <b>17</b> | Unclear implications of EBP for practice in nursing                            |  |  |  |  |  |
| <b>18</b> | EBP has little benefits for nurses                                             |  |  |  |  |  |
| <b>19</b> | The culture of my team is not receptive to EBP implementation                  |  |  |  |  |  |
| <b>20</b> | Uncertainty to believe the results of the research working to nurses' practice |  |  |  |  |  |

### **Part VI: Facilitators for utilization of EBP**

| <b>s. no</b> | Please respond to the next items by indicating the number 1, 2, 3, 4, or 5 that comes closer to what extent do you agree with the following items that support EBP utilization. | <b>1</b> | <b>2</b> | <b>3</b> | <b>4</b> | <b>5</b> |
|--------------|---------------------------------------------------------------------------------------------------------------------------------------------------------------------------------|----------|----------|----------|----------|----------|
| <b>1</b>     | Cooperative & supportive nursing colleagues                                                                                                                                     |          |          |          |          |          |
| <b>2</b>     | Enhancing administrative support like nurse managers                                                                                                                            |          |          |          |          |          |
| <b>3</b>     | Improving research knowledge                                                                                                                                                    |          |          |          |          |          |
| <b>4</b>     | Sufficient staffing/human power                                                                                                                                                 |          |          |          |          |          |
| <b>5</b>     | Giving adequate training                                                                                                                                                        |          |          |          |          |          |

Thank you!!!
